# Supplementary material for: Targeting annexin A2 reduces tumorigenesis and therapeutic resistance of nasopharyngeal carcinoma
Source: PubMed Central journal article supplement (PMC4694965; doi:10.18632/oncotarget.4521), 2015-07-09
Supplement: oncotarget-06-26946-s001.pdf [file oncotarget-06-26946-s001.pdf]

## SUPPLEMENTARY FIGURES

(A)

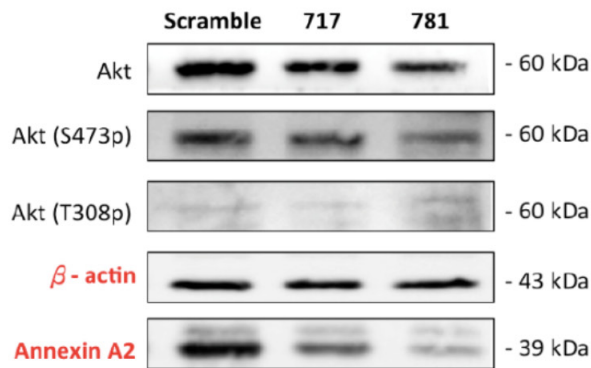

(B)

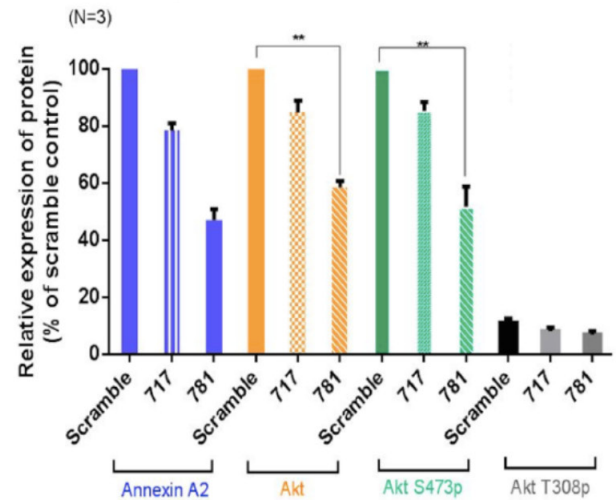

**Supplementary Figure S1: Knockdown of annexin A2 down-regulates the expression of total Akt and Akt phosphorylation at S473.** A. TW01-scramble, TW01-717 and TW01-781 total cell lysates were prepared, and the level of total Akt, Akt phosphorylated at S473 and T308 were assayed by Western blotting. B. Semi-quantitative analysis of western blotting, mean  $\pm$  SEM of triplicates from 3 independent experiments. Mean  $\pm$  SEM \* $P$  < 0.05; \*\* $P$  < 0.01; \*\*\* $P$  < 0.001, significant different from control ( $t$ -test).

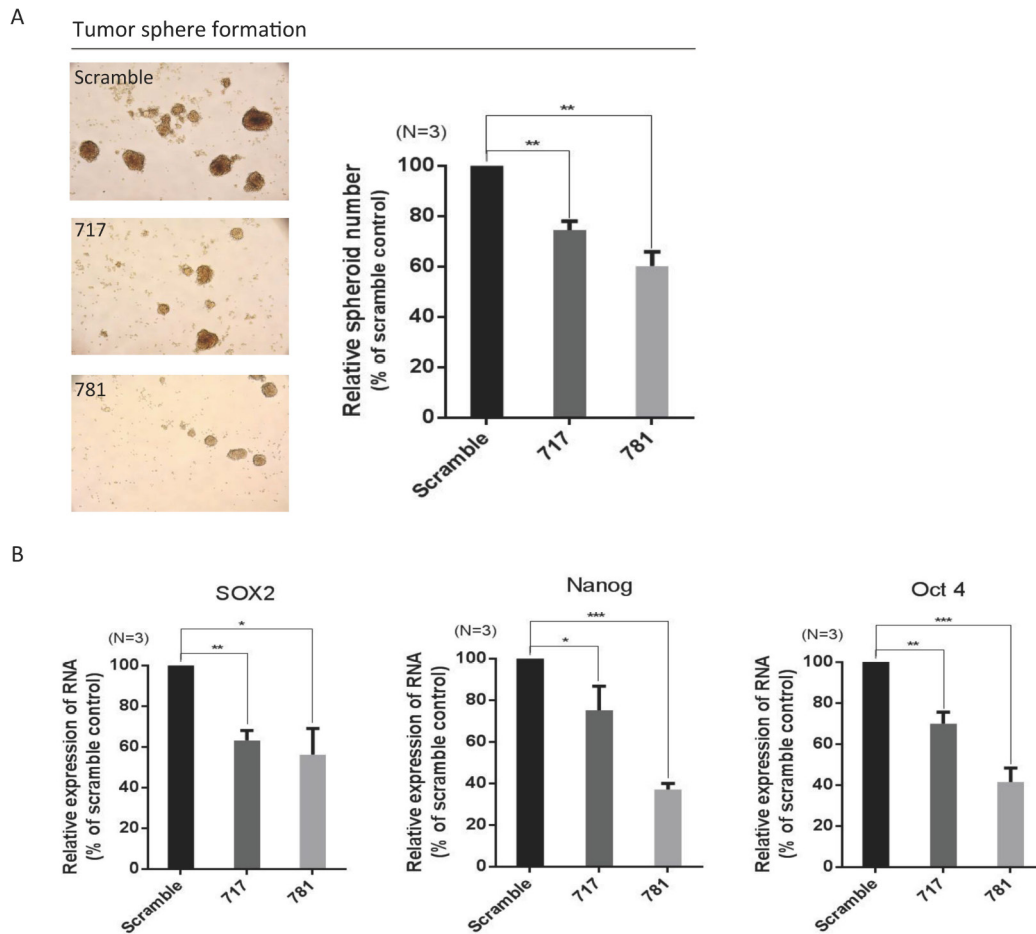

**Supplementary Figure S2: Knockdown of annexin A2 suppressed cancer stemness.** **A.** Knockdown ANXA2 suppressed tumor sphere formation. TW01-scramble, TW01-717 and TW01-781 cells were cultured in DMEM/F12 serum free medium containing basic fibroblast growth factor (bFGF), epidermal growth factor (EGF) and B27 supplement in ultralow attachment plates. After 2 weeks, tumor spheres were visualized and enumerated by microscopy. **B.** The mRNA levels of Sox2, Oct4 and Nanog in TW01-scramble, TW01-717 and TW01-781 cells were measured by RT-qPCR. \* $P < 0.05$ , \*\* $P < 0.01$ , \*\*\* $P < 0.001$ . Error bars represent mean  $\pm$  SD of triplicates.
